# Supplementary material
Source: Springer Nature journal article supplement (https://www.springermedizin.de/resource/supplementary/12874_2011_739_MOESM2_ESM.pdf/9432864)
Supplement: MOESM2 [file 9432864]

**Medical Care Use**

**Symptom based**

Accident/emergency  
or inpatient  
treatment

Serious  
injuries

Fracture (hip,  
other), head or  
internal injury

Medical/health  
professional  
examination

Moderate  
injuries

Wounds, bruises,  
sprains, cuts,  
abrasions

No health  
professional  
assistance  
required

Minor  
injuries

Minor bruise or  
abrasion; reduction in  
physical function for  
at least 3 days

Sample-size

Accuracy

Incidence of injurious falls
